# Supplementary material
Source: Springer Nature journal article supplement (https://www.springermedizin.de/resource/supplementary/12990_2011_394_MOESM1_ESM.pdf/9613180)

Striatum

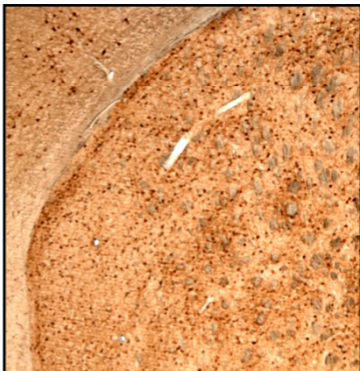

Somato-sensory cortex

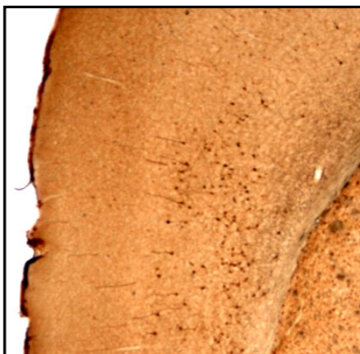

Amygdala

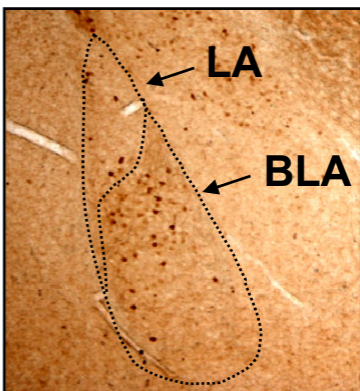

Supplement: MOESM1 [file 9613180]
